# Supplementary material for: Preparation and characterization of TiO2–Graphene@Fe3O4 magnetic composite and its application in the removal of trace amounts of microcystin-LR
Source: Royal Society of Chemistry journal article supplement (doi:10.1039/c4ra08258c), 2014-01-01
Supplement: c4ra08258c1.pdf [file c4ra08258c1.pdf]

# **Preparation and characterization of TiO<sub>2</sub>-graphene@Fe<sub>3</sub>O<sub>4</sub> magnetic composite and its application on the removal of trace microcystin-LR**

**Yulu Liang <sup>a</sup>, Xiwen He <sup>a</sup>, Langxing Chen <sup>\*a</sup> and, Yukui Zhang<sup>a,b</sup>**

*<sup>a</sup>State Key Laboratory of Medical Chemical Biology, Research Center for Analytical Science, College of Chemistry, Nankai University, Tianjin 300071, China. Collaborative Innovation Center of Chemical Science and Engineering (Tianjin).*

*E-mail: lxchen@nankai.edu.cn; Tel: 0086+0 22-23505091; Fax: 0086+0 22-23502458*

*<sup>b</sup>Dalian Institute of Chemical Physics, Chinese Academy of Sciences, Dalian 116011, P. R. China.*

*E-mail: ykzhang@dicp.ac.cn; Tel: 0086+411-84379560; Fax:0086+411-84379560*

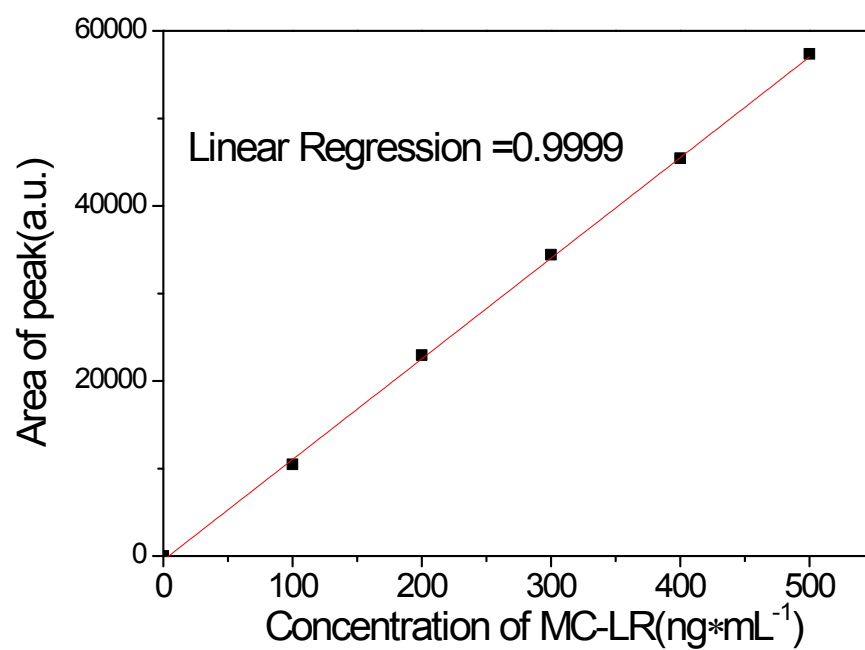

**Figure S1** The linear relationship plot of MC-LR concentration and the HPLC peak area.

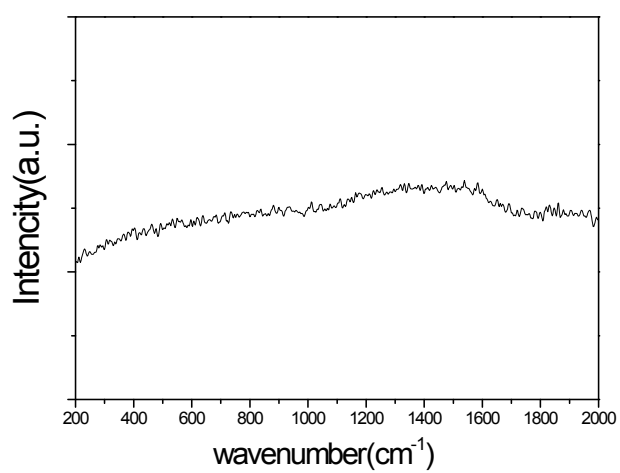

**Figure S2** FT-Raman spectra of the Fe<sub>3</sub>O<sub>4</sub> nanoparticles.

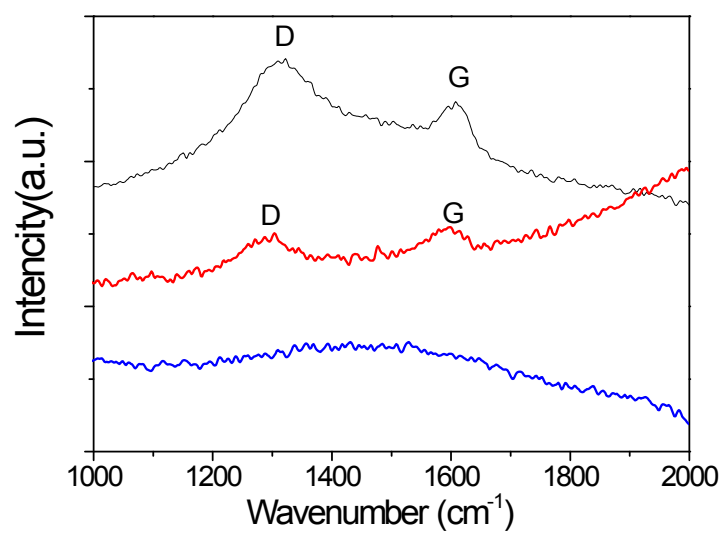

**Figure S3** FT-Raman spectra of the graphene oxide (blue), reduced graphene (red) and graphene@Fe<sub>3</sub>O<sub>4</sub> composite (black).

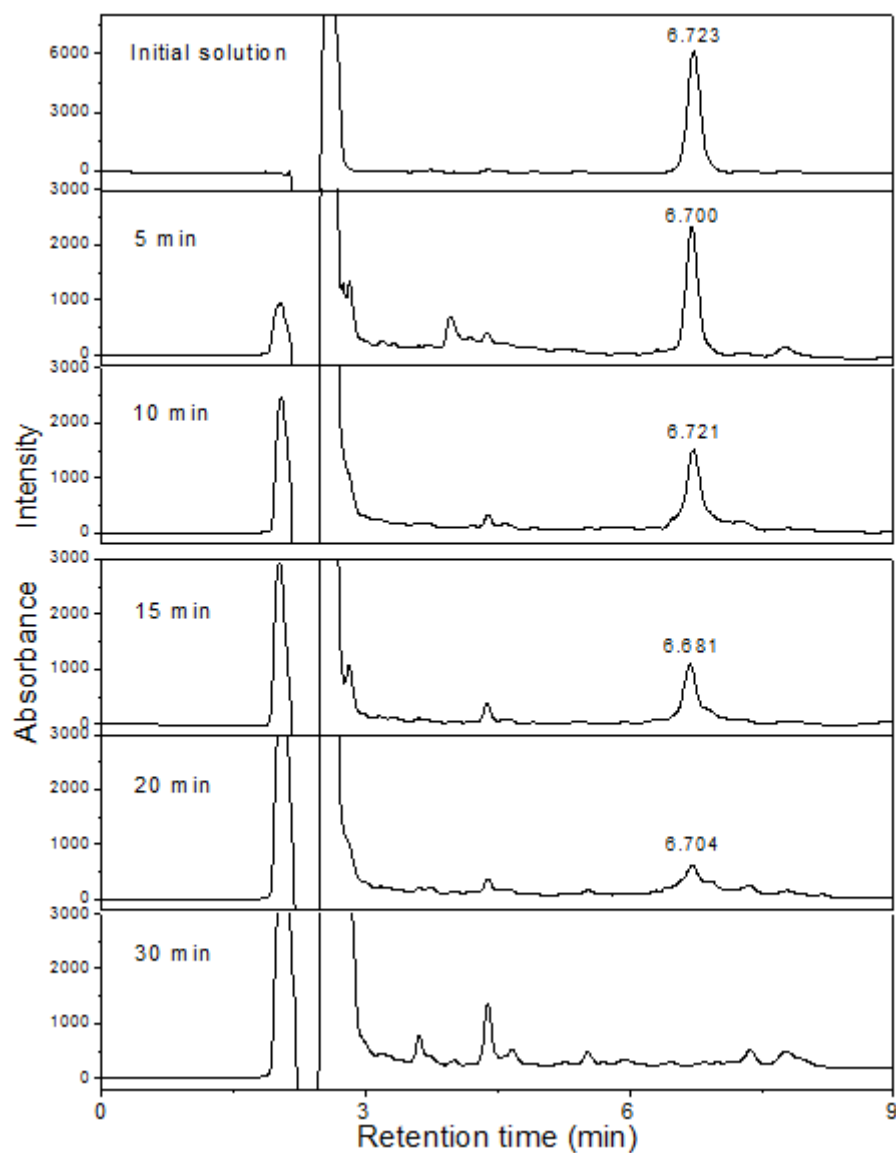

**Figure S4** HPLC chromatograms of MC-LR. Initial solution and photocatalytically degraded for 5 min, 10 min, 15min, 20 min and 30 min with the  $\text{TiO}_2$ -grapheme@ $\text{Fe}_3\text{O}_4$  nanocomposite, respectively.
